# Supplementary material for: Life cycle assessment of combination of anaerobic digestion and pyrolysis: focusing on different options for biogas use
Source: Copernicus journal article supplement (doi:10.5194/adgeo-49-57-2019), 2019-08-29
Supplement: Supplementary file 1 [file adgeo-49-57-2019-supplement.pdf]

Supplement of Adv. Geosci., 49, 57–66, 2019  
<https://doi.org/10.5194/adgeo-49-57-2019-supplement>  
© Author(s) 2019. This work is distributed under  
the Creative Commons Attribution 4.0 License.

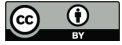

*Supplement of*

## **Life cycle assessment of combination of anaerobic digestion and pyrolysis: focusing on different options for biogas use**

**Ali Mohammadi et al.**

*Correspondence to:* Ali Mohammadi (mohammadia2011@gmail.com, ali.mohammadi@kau.se)

The copyright of individual parts of the supplement might differ from the CC BY 4.0 License.

This supporting information contains 2 tables, detailing element concentration in biosludge and datasets used for modelling LCA scenarios.

**Table S1.** Element concentration (% dry matter) in biosludge<sup>a</sup>.

| Elements        |      |
|-----------------|------|
| Ash             | 17.0 |
| N               | 3.15 |
| P               | 0.44 |
| K               | 0.16 |
| Mg              | 0.13 |
| Ca              | 0.58 |
| C               | 46.4 |
| S               | 1.48 |
| H               | 5.95 |
| O               | 28.5 |
| Calorific value | 18.1 |

<sup>a</sup> Estimated from (Ahlroth et al., 2016; Mohammadi et al., 2019).

**Table S2.** The datasets used for the three LCA scenarios.

| Substance                                                          | Process name                                              | Reference product      | Scenario |
|--------------------------------------------------------------------|-----------------------------------------------------------|------------------------|----------|
| <i>Ecoinvent 3.0 dataset</i>                                       |                                                           |                        |          |
| Calcium chloride (CaCl <sub>2</sub> )                              | Market for calcium chloride [GLO]                         | 0.36 [kg]              | A, B, C  |
| Sodium persulfate (Na <sub>2</sub> S <sub>2</sub> O <sub>8</sub> ) | Market for sodium persulfate [GLO]                        | 0.35 [kg]              | A, B, C  |
| Sodium hydroxide (NaOH)                                            | sodium hydroxide production [RNA]                         | 18.6 [kg]              | A, B, C  |
| Ammonia (NH <sub>3</sub> )                                         | Market for ammonia liquid [RER]                           | 0.89 [kg]              | A, B, C  |
| Hydrochloric acid (HCl)                                            | Market for hydrochloric acid [RoW]                        | 1.1 [kg]               | A, B, C  |
| Sulphuric acid (H <sub>2</sub> SO <sub>4</sub> )                   | Market for sulphuric acid [GLO]                           | 0.66 [kg]              | A, B, C  |
| Sodium chloride (NaCl)                                             | Market for sodium chloride [GLO]                          | 0.32 [kg]              | A, B, C  |
| Polymer                                                            | Market for acrylonitrile [GLO]                            | 9 [kg]                 | A, B, C  |
| Electricity                                                        | Market for electricity, medium voltage [BR]               | 781 [kWh]              | B        |
| Electricity                                                        | Market for electricity, medium voltage [BR]               | -547.9 [kWh]           | B        |
| Electricity                                                        | Market for electricity, medium voltage [CN]               | 781 [kWh]              | C        |
| District heat                                                      | Heat, district or industrial, other than natural gas [SE] | -4680 [MJ]             | C        |
| Liquefied petroleum gas                                            | Market for liquefied petroleum gas [RoW]                  | -138 [kg]              | B        |
| Transport                                                          | Lorry transport, 16-22 metric ton, Euro 3 [GLO]           | 23.8 [kg]              | B, C     |
| Natural gas                                                        | Market for liquefied natural gas [GLO]                    | -153 [m <sup>3</sup> ] | C        |
| Diesel                                                             | Market for diesel [Europe without Switzerland]            | 0.1 [l]                | A        |
| Diesel                                                             | Market for diesel [RoW]                                   | 0.1 [l]                | B, C     |
| Loading and spreading biochar                                      | Solid manure loading and spreading [CH]                   | 188.2 [kg]             | A        |
| Loading and spreading biochar                                      | Solid manure loading and spreading [RoW]                  | 188.2 [kg]             | B, C     |
| <i>ELCD dataset</i>                                                |                                                           |                        |          |
| Electricity                                                        | Electricity consumption mix [SE]                          | 823.5 [kWh]            | A        |
| Transport                                                          | Lorry transport, Euro 0,1,2,3,4 mix, 22 t weight [RER]    | 23.8 [kg]              | A        |

## References

- Ahlroth, M., Bialik, M., and Jensen, A.: Hydrothermal carbonization of pulp- and paper mill effluent sludge. Åforsk project 15-489. Innventia Report No April 2016, 2016.
- Mohammadi, A., Sandberg, M., Venkatesh, G., Eskandari, S., Dalgaard, T., Joseph S., and Granström, K.: Environmental analysis of producing biochar and energy recovery from pulp and paper mill biosludge, *Journal of Industrial Ecology*, DOI: 10.1111/jiec.12838, 1-13, 2019.
